# Supplementary material
Source: PubMed Central journal article supplement (PMC6421250)
Supplement: Supplemental_tables.pdf [file Supplemental_tables.pdf]

**Supplemental Tables**

Table 1 Gene symbol and sequence of each primer and probe used in real time PCR

| Gene Symbol | Sequence                                                                            |
|-------------|-------------------------------------------------------------------------------------|
| Colla1      | Forward: 5'-GCTCCTCTTAGGGGCCACT-3'<br>Reverse: 5'-CCACGTCTCACCATTGGGG-3'            |
| Col2a1      | Forward: 5'-CAGGATGCCCGAAAATTAGGG-3'<br>Reverse: 5'-ACCACGATCACCTCTGGGT-3'          |
| Col4a1      | Forward: 5'-CTGGCACAAAAGGGACGAG-3'<br>Reverse: 5'-ACGTGGCCGAGAATTCACC-3'            |
| Col4a2      | Forward: 5'-GACCGAGTGCGGTTCAAAG-3'<br>Reverse: 5'-CGCAGGGCACATCCAATT-3'             |
| Lama2       | Forward: 5'-ATGGCTTCCCGTACTTCAGTT-3'<br>Reverse: 5'-ACCGCCAACAAAAACAGGGT-3'         |
| Lama3       | Forward: 5'-ACACCTGGGACGTGGATTG-3'<br>Reverse: 5'-CTTGCAGGGTGAATGCTTCAT -3'         |
| Lamb2       | Forward: 5'-GAACTTCGCTTGGGCCTACTT-3'<br>Reverse: 5'-GGTGGCTGGATAGCAGCTT-3'          |
| Sele        | Forward: 5'-ATGCCTCGCGCTTTCTCTC-3'<br>Reverse: 5'-GTAGTCCCGCTGACAGTATGC-3'          |
| Sell        | Forward: 5'-TACATTGCCCAAAGCCCTTAT-3'<br>Reverse: 5'-CATCGTTCCATTCCAGAGTC-3'         |
| Selp        | Forward: 5'-CATCTGGTTCAGTGCTTTGATCT-3'<br>Reverse: 5'-ACCCGTGAGTTATCCATGAGT-3'      |
| Icam1       | Forward: 5'-GTGATGCTCAGGTATCCATCCA -3'<br>Reverse: 5'-CACAGTTCTCAAAGCACAGCG -3'     |
| Vcam1       | Forward: 5'-AGTTGGGGATTTCGGTTGTTCT-3'<br>Reverse: 5'-CCCCTCATTCTTACCACCC-3'         |
| Vcan        | Forward: 5'-ACTAACCATGCACTACATCAAG-3'<br>Reverse: 5'-ACTTTTCCAGACAGAGAGCCTT-3'      |
| LH1         | Forward: 5'- GAAGGATGACGCCAAGCTAGA-3'<br>Reverse: 5'- TGAAGAACTGAGCTGAACGCT-3'      |
| LH2         | Forward: 5'-GAGAGGCGGTGATGGAATGAA-3'<br>Reverse: 5'-ACTCGGTAAACAAGATGACCAGA-3'      |
| LH3         | Forward: 5'-AGGACTGAACTGCCCCAAAAG-3'<br>Reverse: 5'- CCCTCTTACCACAGGGTTGT-3'        |
| Ccl2        | Forward: 5'- TTA AAAACCTGGATCGGAACCAA-3'<br>Reverse: 5'- GCATTAGCTTCAGATTTACGGGT-3' |
| Ccl12       | Forward: 5'- ATTTCCACACTTCTATGCCTCCT-3'<br>Reverse: 5'- ATCCAGTATGGTCCTGAAGATCA-3'  |
| Tnf         | Forward: 5'- CCCTCACACTCAGATCATCTTCT-3'<br>Reverse: 5'- GCTACGACGTGGGCTACAG-3'      |
| Gene Symbol | Sequence                                                                            |

|       |                                                                                    |
|-------|------------------------------------------------------------------------------------|
| Ptgs2 | Forward: 5'- TTCAACACACTCTATCACTGGC-3'<br>Reverse: 5'- AGAAGCGTTTGCGGTACTCAT-3'    |
| Ncf1  | Forward: 5'- ACACCTTCATTTCGCCATATTGC-3'<br>Reverse: 5'- TCGGTGAATTTTCTGTAGACCAC-3' |
| Ncf4  | Forward: 5'- GTCATCGAGGTCAAAACAAAAGG-3'<br>Reverse: 5'- GCCCATGTAGACTTTGGCTG-3'    |
| CD14  | Forward: 5'- CTCTGTCCTTAAAGCGGCTTAC-3'<br>Reverse: 5'- GTTGCGGAGGTTCAAGATGTT-3'    |
| CD44  | Forward: 5'- CACCATTGCCTCAACTGTGC-3'<br>Reverse: 5'- TTGTGGGCTCCTGAGTCTGA-3'       |
| Itgb2 | Forward: 5'- CAGGAATGCACCAAGTACAAAGT-3'<br>Reverse: 5'- CCTGGTCCAGTGAAGTTCAGC-3'   |
| Itgam | Forward: 5'- ATGGACGCTGATGGCAATACC-3'<br>Reverse: 5'- TCCCCATTCACGTCTCCCA-3'       |

Table 2 Baseline characteristics of patients with intracerebral hemorrhage and controls

| <b>Characteristics</b> | <b>Controls<br/>(n=34)</b> | <b>ICH<br/>(n=34)</b> | <b>P value</b> |
|------------------------|----------------------------|-----------------------|----------------|
| Age, y                 | 58.9±6.5                   | 55.7±7.8              | 0.072          |
| Male sex, %            | 19 (55.9)                  | 17 (50.0)             | 0.627          |

|                        |                |                |        |
|------------------------|----------------|----------------|--------|
| BMI, kg/m <sup>2</sup> | 24.4±2.5       | 27.4±9.3       | 0.649  |
| SBP, mmHg              | 131.3±5.9      | 167.9±17.7     | <0.001 |
| DBP, mmHg              | 79.5±5.3       | 105.1±10.7     | <0.001 |
| TC, mmol/L             | 5.1 (4.3, 5.9) | 4.8 (4.2, 5.4) | 0.086  |
| TG, mmol/L             | 1.3 (0.8, 1.6) | 1.5 (1.0, 2.2) | 0.133  |
| GLU, mmol/L            | 5.4 (5.0, 5.9) | 5.6 (5.1, 6.9) | 0.165  |
| Cigarette smoking, %   |                |                | 0.770  |
| Never                  | 22 (64.7)      | 22 (64.7)      |        |
| Former                 | 4(11.8)        | 5 (14.7)       |        |
| Current                | 8 (23.5)       | 7 (20.6)       |        |
| Alcohol intake, %      |                |                | 0.622  |
| Nondrinker             | 19 (55.9)      | 21 (61.8)      |        |
| Drinker                | 15 (44.1)      | 13 (38.2)      |        |

Categorical variables are expressed as frequency (percent). Continuous variables are expressed as means ± SD, or as median (interquartile range). Abbreviations: BMI, body mass index; SBP, systolic blood pressure; DBP, diastolic blood pressure; TC, total cholesterol; TG, triglycerides; GLU, glucose; ICH, intracerebral hemorrhage. Statistical comparisons for percentages were performed using  $\chi^2$  analysis. Comparisons between means or medians were performed using a Student's t test.

| <b>Patients ID</b> | <b>Time point of blood collection after ICH (months)</b> | <b>Content of LH3 in serum (ng/ml)</b> | <b>Location of hematoma</b> | <b>ICH Volume (cm<sup>3</sup>)</b> |
|--------------------|----------------------------------------------------------|----------------------------------------|-----------------------------|------------------------------------|
| 1                  | 10                                                       | 5.79                                   | cerebellum                  | 27.46                              |
| 2                  | 10                                                       | 4.67                                   | basal ganglia               | 34.97                              |
| 3                  | 6                                                        | 6.11                                   | thalamus                    | 3.95                               |
| 4                  | 8                                                        | 6.00                                   | thalamus                    | 4.49                               |
| 5                  | 8                                                        | 5.61                                   | basal ganglia               | 8.67                               |
| 6                  | 5                                                        | 5.24                                   | basal ganglia               | 5.59                               |

|    |    |      |               |       |
|----|----|------|---------------|-------|
| 7  | 9  | 5.09 | thalamus      | 6.55  |
| 8  | 5  | 5.65 | temporal lobe | 94.60 |
| 9  | 10 | 5.40 | basal ganglia | 19.50 |
| 10 | 10 | 4.98 | basal ganglia | 22.29 |
| 11 | 7  | 4.26 | basal ganglia | 38.87 |
| 12 | 9  | 5.18 | basal ganglia | 43.56 |
| 13 | 6  | 5.53 | basal ganglia | 30.10 |
| 14 | 6  | 5.49 | basal ganglia | 18.85 |
| 15 | 7  | 5.94 | basal ganglia | 6.61  |
| 16 | 6  | 5.46 | basal ganglia | 21.06 |
| 17 | 6  | 5.28 | basal ganglia | 10.15 |
| 18 | 6  | 5.68 | thalamus      | 0.51  |
| 19 | 6  | 4.78 | basal ganglia | 40.47 |
| 20 | 7  | 5.73 | basal ganglia | 16.62 |
| 21 | 7  | 6.01 | basal ganglia | 21.16 |
| 22 | 5  | 5.90 | basal ganglia | 11.78 |
| 23 | 5  | 5.65 | frontal lobe  | 52.39 |
| 24 | 5  | 6.25 | basal ganglia | 67.28 |
| 25 | 5  | 5.17 | basal ganglia | 11.63 |

Table 3 Detailed hemorrhagic information of patients with intracerebral hemorrhage.

| <b>Patients ID</b> | <b>Time point of blood collection after ICH (months)</b> | <b>Content of LH3 in serum (ng/ml)</b> | <b>Location of hematoma</b> | <b>ICH Volume (cm<sup>3</sup>)</b> |
|--------------------|----------------------------------------------------------|----------------------------------------|-----------------------------|------------------------------------|
| 26                 | 5                                                        | 4.79                                   | basal ganglia               | 4.75                               |
| 27                 | 6                                                        | 3.54                                   | basal ganglia               | 16.50                              |
| 28                 | 6                                                        | 3.94                                   | cerebellum                  | 7.40                               |
| 29                 | 6                                                        | 4.80                                   | thalamus                    | 10.13                              |
| 30                 | 6                                                        | 5.35                                   | brainstem                   | 8.82                               |
| 31                 | 6                                                        | 4.96                                   | basal ganglia               | 4.00                               |
| 32                 | 6                                                        | 5.55                                   | thalamus                    | 16.64                              |
| 33                 | 6                                                        | 5.34                                   | temporal lobe               | 28.22                              |
| 34                 | 6                                                        | 4.38                                   | basal ganglia               | 38.80                              |

Abbreviations: ICH, intracerebral hemorrhage.
